# Supplementary material for: Torsion effect of the imide ring on the performance of transparent polyimide films with methyl-substituted phenylenediamine
Source: Royal Society of Chemistry journal article supplement (doi:10.1039/d2py01325h), 2022-01-01
Supplement: d2py01325h1.pdf [file d2py01325h1.pdf]

## Supporting Information

# **Torsion effect of imide ring on the performance of transparent polyimide films with methyl-substituted phenylenediamine**

*Huanyu Lei<sup>1,2</sup>, Feng Bao<sup>1,2\*</sup>, Weifeng Peng<sup>1,2</sup>, Luhao Qiu<sup>1,2</sup>, Bingyu Zou<sup>1,2</sup>, Mingjun Huang<sup>1,2\*</sup>*

<sup>1</sup> South China Advanced Institute for Soft Matter Science and Technology, School of Emergent Soft Matter, South China University of Technology, Guangzhou 510640, China.

<sup>2</sup> Guangdong Provincial Key Laboratory of Functional and Intelligent Hybrid Materials and Devices, South China University of Technology, Guangzhou 510640, China.

\*Corresponding author

E-mail address:

[huangmj25@scut.edu.cn](mailto:huangmj25@scut.edu.cn) (M.H.)

[fbao@scut.edu.cn](mailto:fbao@scut.edu.cn) (F.B.)

### **This file includes:**

- 1. Supplementary Figure S1-S9**
- 2. Supplementary Table S1-6**

## 1. Supplementary Figure

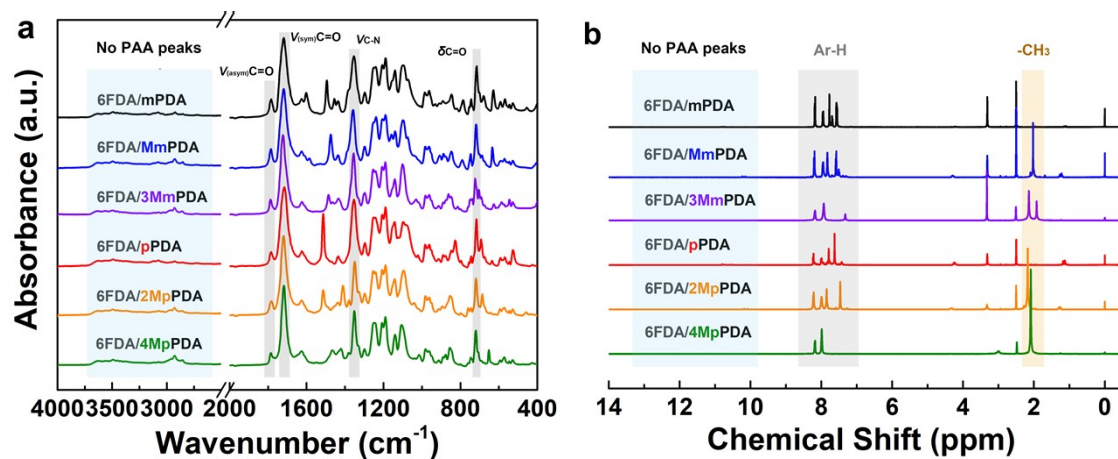

**Fig S1** (a) ATR-FTIR and (b)  $^1\text{H}$  NMR spectra of CPI films. For  $^1\text{H}$  NMR testing, all CPIs were dissolved in  $\text{DMSO}-d_6$  containing TMS as reference, and only 6FDA/4MpPDA CPI was characterized at high temperature (100  $^{\circ}\text{C}$ ) for completed solvation.

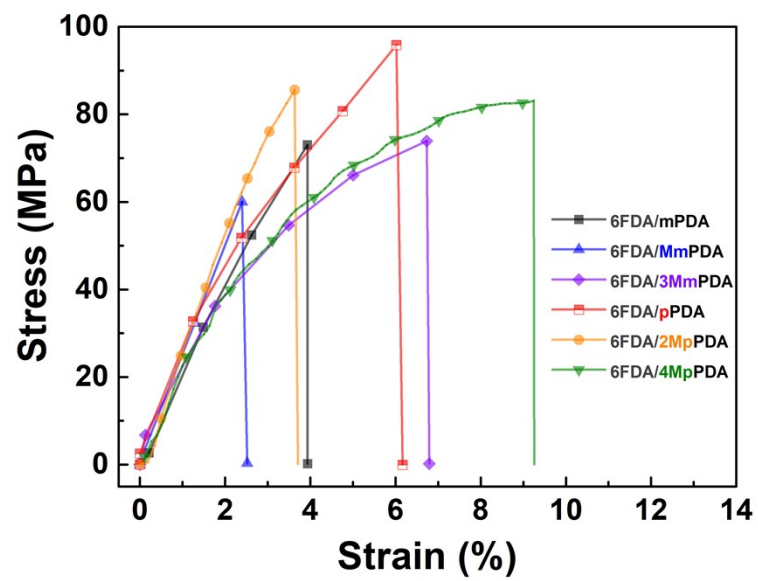

Fig S2 Mechanical properties of CPI films.

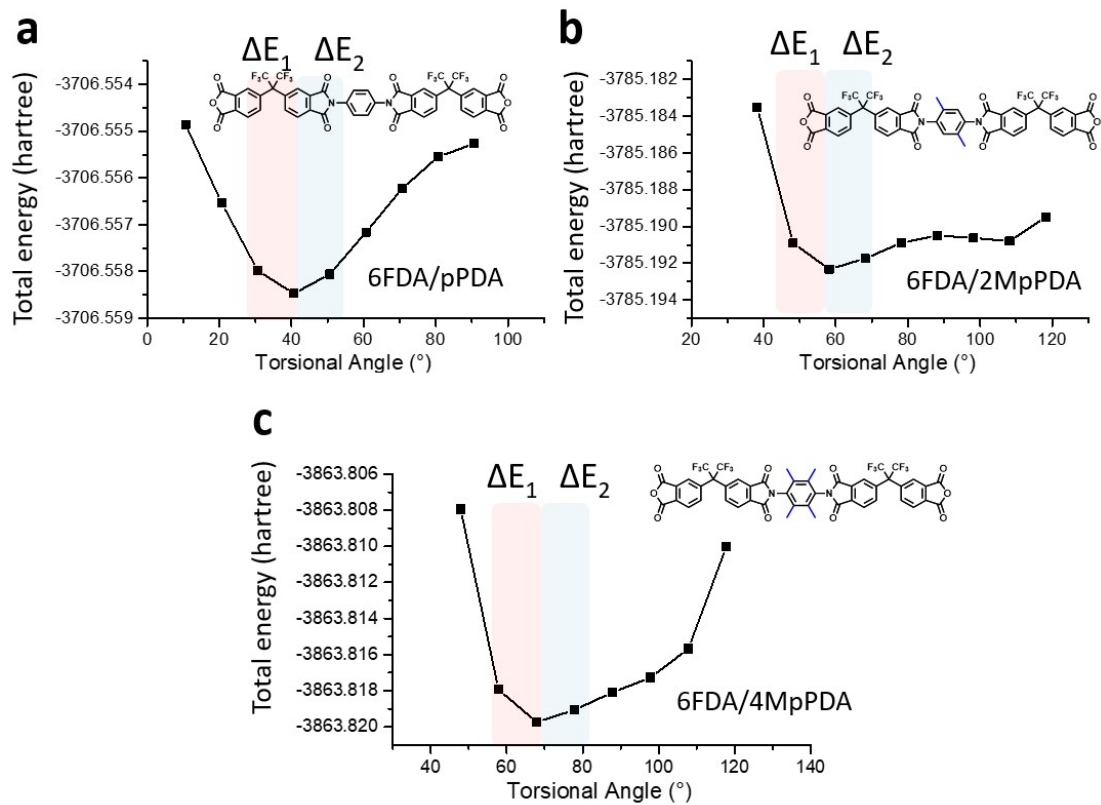

**Fig S3** Energy variation of torsional angle  $\phi_2$  in substituted pPDA series PI structures.

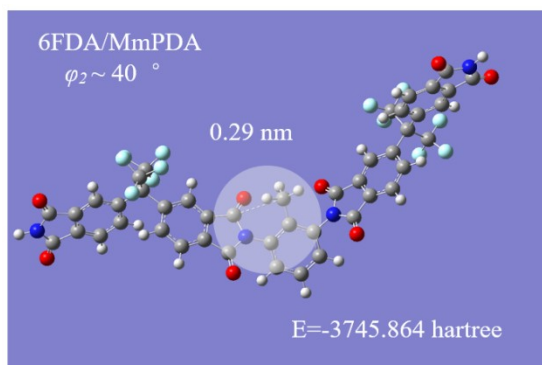

A specific conformation

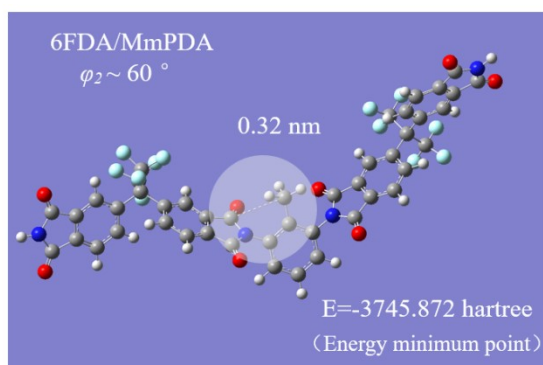

The minimum energy conformation  
after geometry optimization

**Fig S4** Particular conformation of torsional angle (6FDA/MmPDA as example).

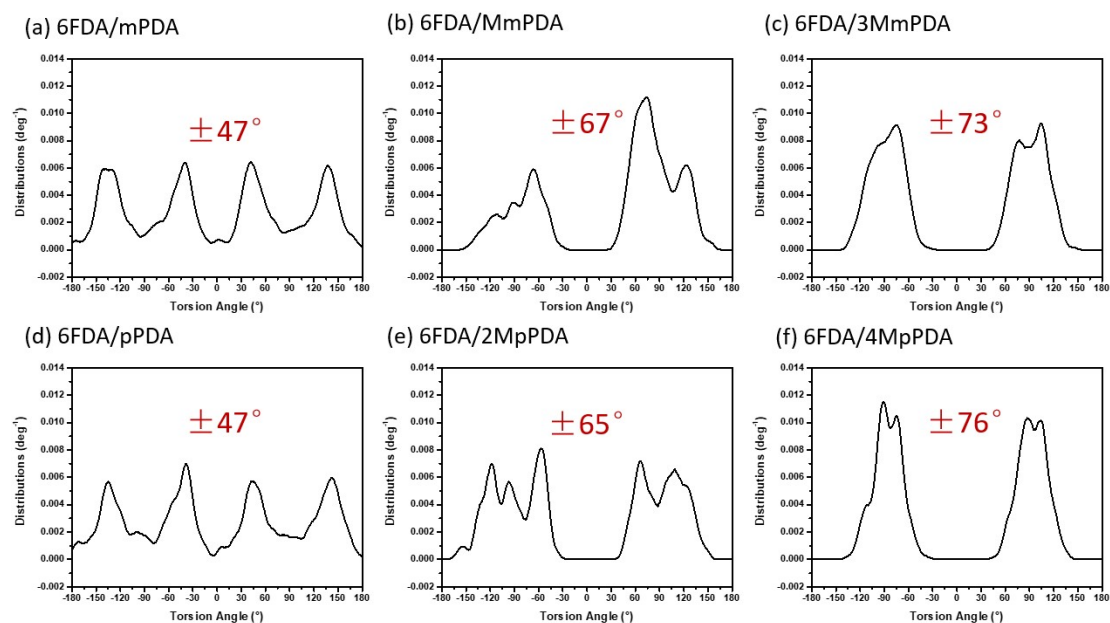

**Fig S5** Distribution of torsional angle in amorphous PI cells. Calculation of the average torsional angle is described as following: searching the torsional angle in PI cells by Forcite module, the angle distributed from  $-180^{\circ}$  to  $+180^{\circ}$  are shown. Y axis stands for the frequency. Integrating the Angle with respect to Y gives the mathematical expectation, which is the average torsional angle. Specifically, the integration angle interval is from  $0^{\circ}$  to  $90^{\circ}$ , and the angle large than  $90^{\circ}$  or less than  $0^{\circ}$  is spatially equivalent to the small angle after subtracting  $90^{\circ}$  (i.e., 120 and 60 are equivalent).

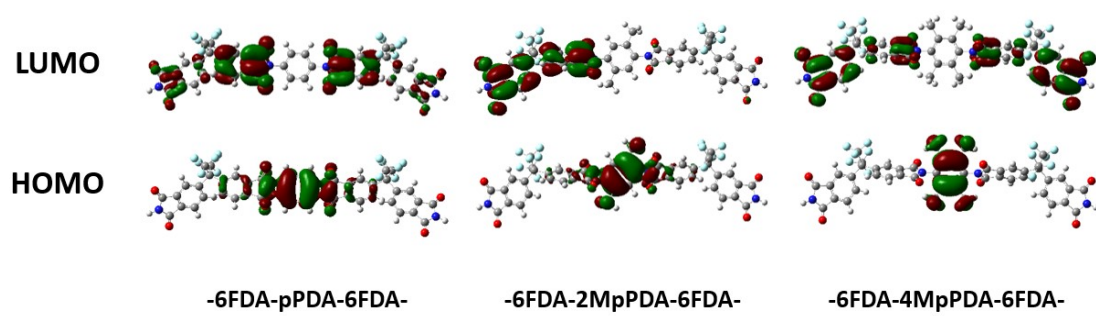

**Fig S6** Molecular orbital (MO) diagrams of the substituted pPDA series polyimide.

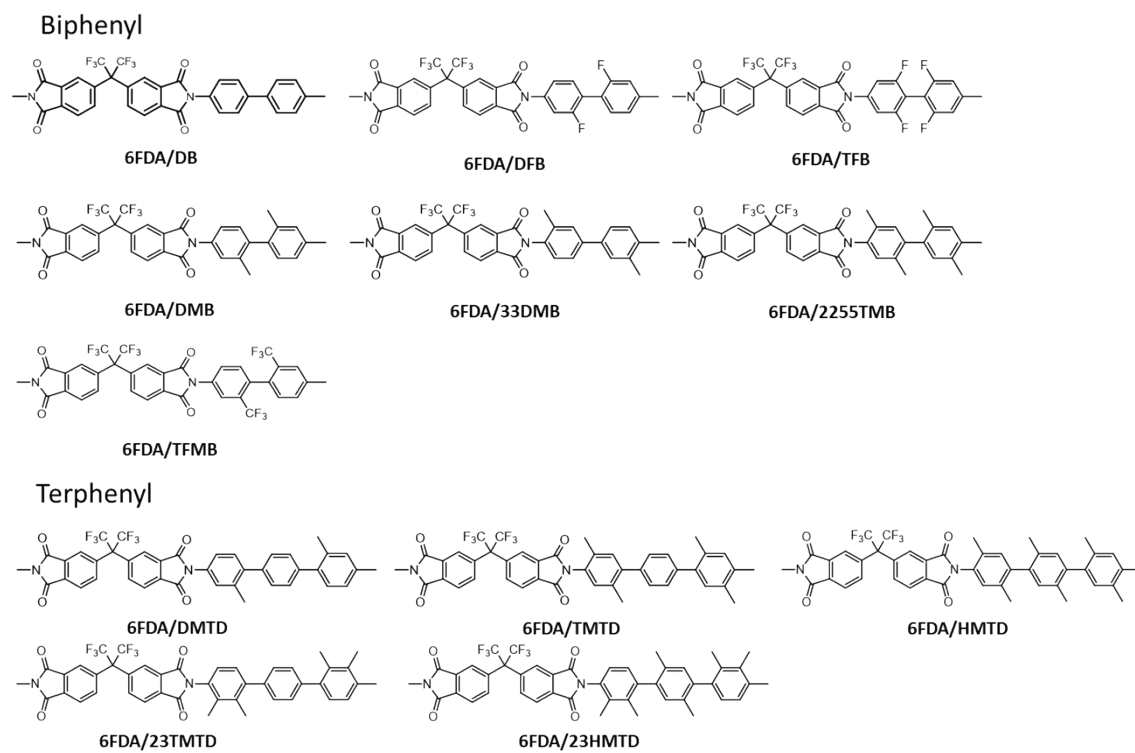

**Fig S7** Chemical structures of previous reported PI structures.



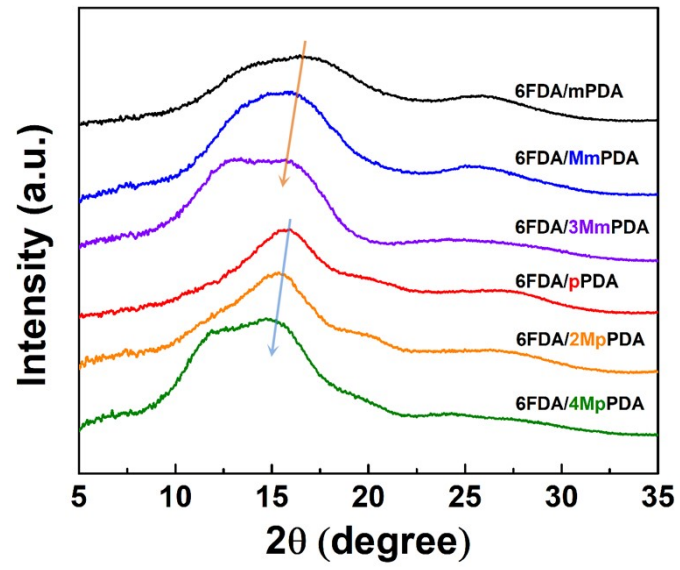

Fig S8 1D WAXD curves of CPI films.

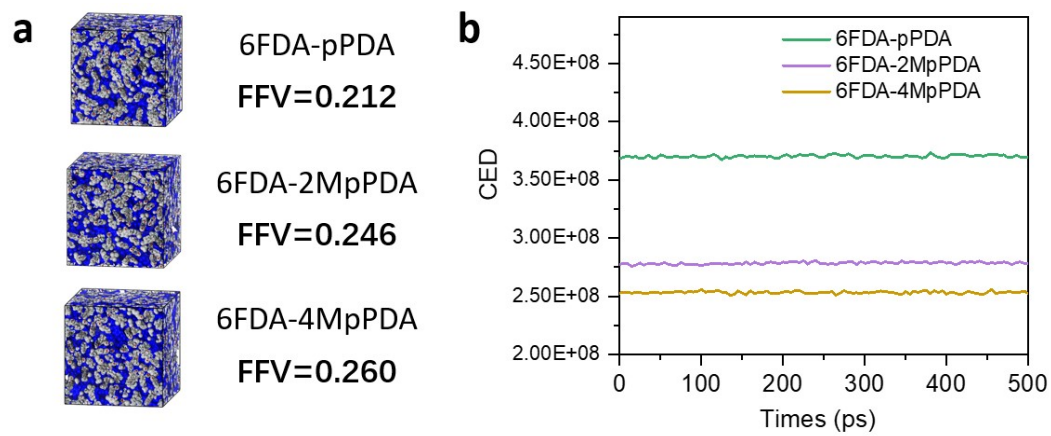

**Fig S9** FFV and CED of amorphous PI cells.

## 2. Supplementary Table

**Table S1** Thermal and mechanical properties of CPI films.

| CPI films   | $T_g$<br>(°C) <sup>a</sup> | CTE<br>(ppm/K) <sup>a</sup> | Fracture<br>strength<br>(MPa) | Initial<br>modulus<br>(GPa) | Elongation at<br>break<br>(%) |
|-------------|----------------------------|-----------------------------|-------------------------------|-----------------------------|-------------------------------|
| 6FDA/mPDA   | 319                        | 49.3                        | 73±5                          | 2.3±0.2                     | 3.9±0.2                       |
| 6FDA/MmPDA  | 368                        | 46.0                        | 60±4                          | 2.7±0.2                     | 2.4±0.1                       |
| 6FDA/3MmPDA | 407                        | 52.0                        | 74±4                          | 1.9±0.1                     | 6.8±0.5                       |
| 6FDA/pPDA   | 374                        | 48.3                        | 96±7                          | 2.5±0.2                     | 6.1±0.4                       |
| 6FDA/2MpPDA | 388                        | 44.8                        | 82±6                          | 3.3±0.2                     | 3.5±0.2                       |
| 6FDA/4MpPDA | 409                        | 40.8                        | 81±4                          | 2.3±0.1                     | 9.5±0.7                       |

a. Thermal expansion coefficient recorded using TMA from 50-250 °C.

**Table S2** Energy barriers of the studied torsional angles

| Samples       | $\Delta E_1$<br>(hartree) | $\Delta E_2$<br>(hartree) | Samples         | $\Delta E_1$<br>(hartree) | $\Delta E_2$<br>(hartree) | Samples         | $\Delta E_1$<br>(hartree) | $\Delta E_2$<br>(hartree) |
|---------------|---------------------------|---------------------------|-----------------|---------------------------|---------------------------|-----------------|---------------------------|---------------------------|
| 6FDA-<br>mPDA | 0.000524                  | 0.000407                  | 6FDA-<br>MmPDA  | 0.001239                  | 0.000512                  | 6FDA-<br>3MmPDA | 0.001833                  | 0.000633                  |
| 6FDA-<br>pPDA | 0.000493                  | 0.000415                  | 6FDA-<br>2MpPDA | 0.001428                  | 0.000583                  | 6FDA-<br>4MpPDA | 0.0018                    | 0.000674                  |

**Table S3** Molecular planarity of different repeating units, including torsional angles, molecular planarity parameter (MPP) and span of deviation from plane (SDP).

| CPI films   | $\varphi_1$ | $\varphi_2$ | Repeat unit |      | Planarity of $\varphi_2$ |      |
|-------------|-------------|-------------|-------------|------|--------------------------|------|
|             |             |             | MPP         | SDP  | MPP                      | SDP  |
| 6FDA/mPDA   | 72.0        | 40.8        | 1.08        | 4.68 | 0.49                     | 1.95 |
| 6FDA/MmPDA  | 72.1        | 60.5        | 1.09        | 5.07 | 0.89                     | 3.43 |
| 6FDA/3MmPDA | 72.0        | 73.8        | 1.13        | 5.46 | 1.03                     | 4.61 |
| 6FDA/pPDA   | 71.9        | 39.5        | 1.07        | 4.68 | 0.52                     | 1.73 |
| 6FDA/2MpPDA | 71.5        | 60.8        | 1.07        | 5.11 | 0.92                     | 3.76 |
| 6FDA/4MpPDA | 72.1        | 66.6        | 1.08        | 5.40 | 0.96                     | 4.33 |

**Table S4** Calculation of charge transfer, energy gap and properties of excited states.

| CPI films   | $E_{\text{HOMO}}/\text{eV}$ | $E_{\text{LUMO}}/\text{eV}$ | $E_{\text{g}} (\text{eV})$ | $E_{\text{ex}} (\text{eV})$ | $\lambda_{\text{ex}} (\text{nm})$ |
|-------------|-----------------------------|-----------------------------|----------------------------|-----------------------------|-----------------------------------|
| 6FDA/mPDA   | -6.66                       | -2.73                       | 3.93                       | 4.03                        | 307.7                             |
| 6FDA/MmPDA  | -6.90                       | -2.70                       | 4.19                       | 4.09                        | 303.2                             |
| 6FDA/3MmPDA | -6.77                       | -2.69                       | 4.09                       | 4.05                        | 306.2                             |
| 6FDA/pPDA   | -6.50                       | -2.75                       | 3.75                       | 3.92                        | 316.3                             |
| 6FDA/2MpPDA | -6.67                       | -2.70                       | 3.96                       | 4.06                        | 305.4                             |
| 6FDA/4MpPDA | -6.46                       | -2.69                       | 3.77                       | 4.05                        | 306.2                             |

**Table S5** Optical properties and DFT recalculated results of previous reported PI structures (Chemical structures see Fig. S7).

| Compositon   | Literatures' data                 |                  | DFT recalculated results  |                           |                        |                         |
|--------------|-----------------------------------|------------------|---------------------------|---------------------------|------------------------|-------------------------|
|              | $\lambda_{\text{cutoff}}$<br>(nm) | $T_{400}$<br>(%) | $E_{\text{HOMO}}$<br>(eV) | $E_{\text{LUMO}}$<br>(eV) | $E_{\text{g}}$<br>(eV) | $E_{\text{ex}}$<br>(eV) |
| 6FDA/DB      | 361                               | 14.5             | -6.08                     | -2.69                     | 3.39                   | 3.77                    |
| 6FDA/DFB     | 342                               | 50.3             | -6.22                     | -2.76                     | 3.46                   | 3.87                    |
| 6FDA/TFB     | 335                               | 63.1             | -6.52                     | -2.85                     | 3.67                   | 4.04                    |
| 6FDA/DMB     | 342                               | 44.1             | -6.42                     | -2.67                     | 3.75                   | 3.89                    |
| 6FDA/TFMB    | 322                               | 80.2             | -6.83                     | -2.83                     | 4.00                   | 4.06                    |
| 6FDA/33DMB   | 338                               | 66.0             | -6.09                     | -2.66                     | 3.43                   | 3.92                    |
| 6FDA/2255TMB | 308                               | 82.0             | -6.25                     | -2.65                     | 3.60                   | 3.99                    |
| 6FDA/DMTD    | 349.0                             | 30.0             | -5.96                     | -2.67                     | 3.29                   | 3.78                    |
| 6FDA/TMTD    | 318.0                             | 73.0             | -5.93                     | -2.65                     | 3.28                   | 3.93                    |
| 6FDA/HMTD    | 305.0                             | 81.0             | -6.18                     | -0.10                     | 3.53                   | 3.98                    |
| 6FDA/23TMTD  | 310.0                             | 78.0             | -6.01                     | -2.65                     | 3.36                   | 3.98                    |
| 6FDA/23HMTD  | 305.0                             | 81.0             | -6.15                     | -2.65                     | 3.50                   | 4.02                    |

The optical properties of these PI films ( $\sim 20 \mu\text{m}$ ) are reported in previous literatures. The DFT simulations towards these PI structures are all re-calculated at DFT/B3LYP/6-31g (d) level with Gaussian 16 package after geometry optimization. And the  $E_{\text{ex}}$  are calculated at TDDFT/CAM-B3LYP/6-311++g (d,p).



**Table S6** WAXD results of CPI films.

| CPI films   | $2\theta$ (°) | $d$ -spacing (Å) |
|-------------|---------------|------------------|
| 6FDA/mPDA   | 15.9          | 5.57             |
| 6FDA/MmPDA  | 15.4          | 5.75             |
| 6FDA/3MpPDA | 14.8          | 5.98             |
| 6FDA/pPDA   | 16.0          | 5.54             |
| 6FDA/2MpPDA | 15.6          | 5.68             |
| 6FDA/4MpPDA | 15.0          | 5.90             |
